# Supplementary material for: Investigation on the role of different conductive polymers in supercapacitors based on a zinc sulfide/reduced graphene oxide/conductive polymer ternary composite electrode
Source: Royal Society of Chemistry journal article supplement (doi:10.1039/c9ra07842h), 2020-01-01
Supplement: c9ra07842h1.pdf [file c9ra07842h1.pdf]

## Supporting information

### Investigation on the Role of Different Conductive Polymer in Supercapacitors Based on Zinc Sulfide/Reduced Graphene Oxide/Conductive Polymers Ternary Composites Electrode

Zichen Xu,<sup>a</sup> Zhiqiang Zhang,<sup>a</sup> Huiling Yin,<sup>a</sup> Shengxian Hou,<sup>a</sup> Hongtao Lin,<sup>\*a</sup> Jin Zhou<sup>a</sup> and Shuping Zhuo<sup>\*a</sup>

<sup>a</sup> School of Chemistry and Chemical Engineering, Shandong University of Technology, Zibo 255000, P. R. China. E-mail: linht@sdut.edu.cn

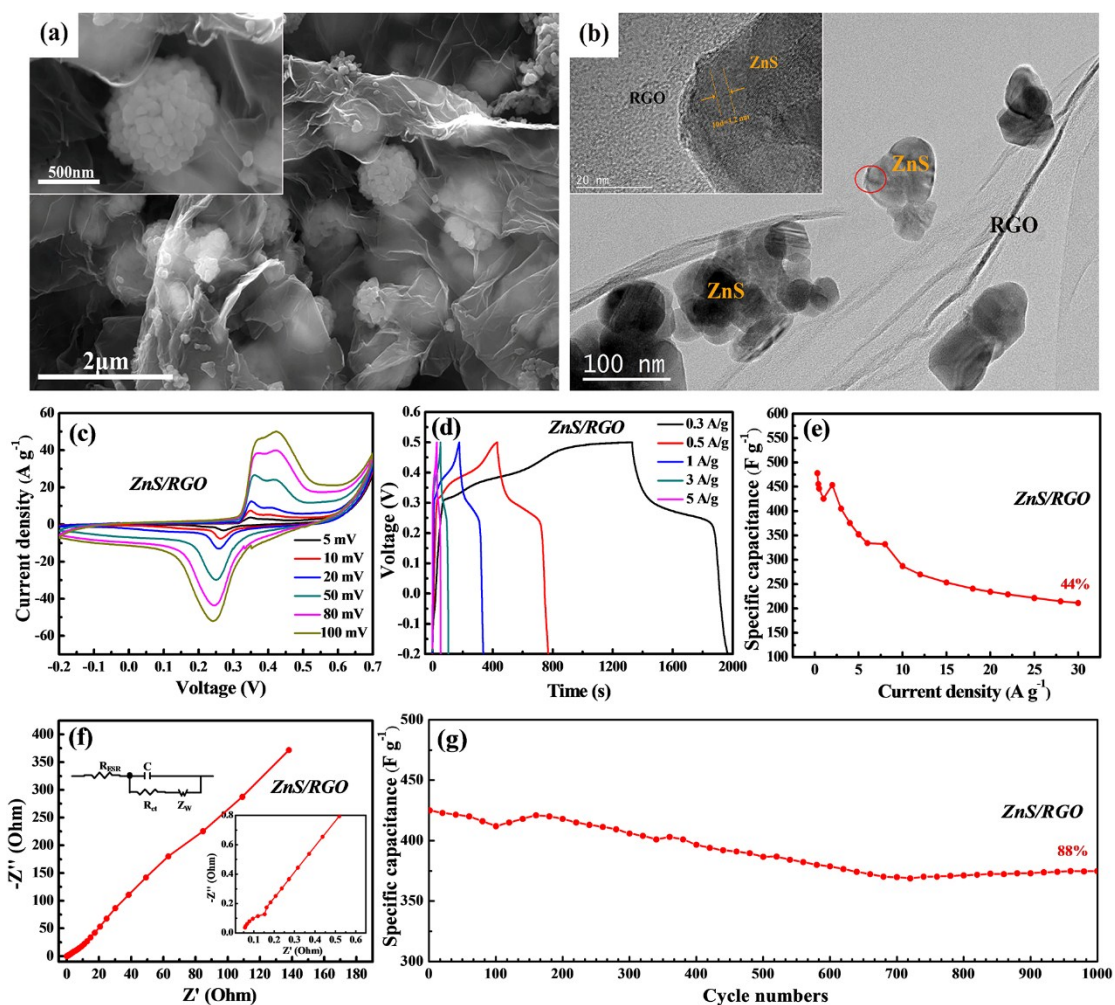

**Fig. S1** Morphological structure of ZnS/RGO composite: (a) SEM image and (b) HRTEM image, and the electrochemical properties of ZnS/RGO electrode for three-electrode system: (c) CV curves at different scan rate, (d) GCD profiles at various current density, (e) specific capacitance at different current density, (f) Nyquist plot at frequency range from 100 kHz to 0.01 Hz and (g) cycle performance at 1 A g<sup>-1</sup>.

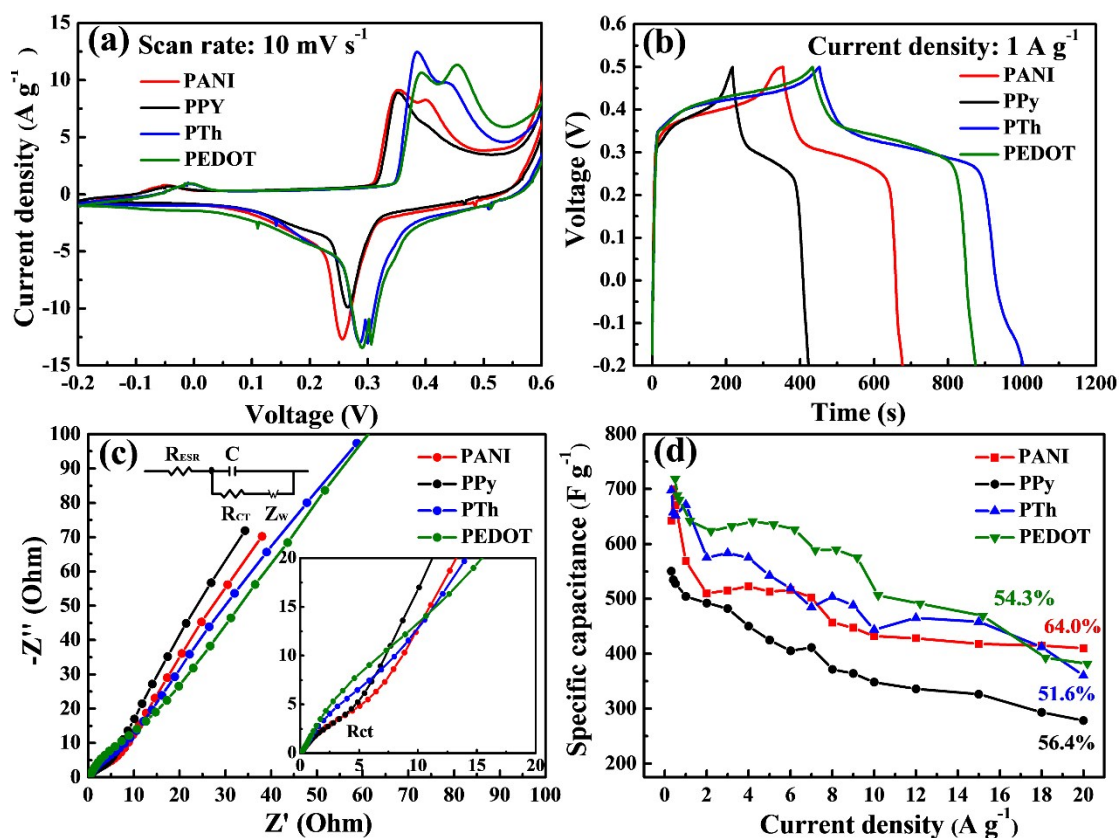

**Fig. S2** The electrochemical performance of conductive polymers (CPs, such as Polyaniline (PANI), Polypyrrole (PPy), Polythiophene (PTh) and poly 3, 4-ethylenedioxythiophene (PEDOT)) in three-electrode system : (a) CV curves at scan rate of 10 mV s<sup>-1</sup>, (b) GCD plots at current density of 1 A g<sup>-1</sup>, (c) Nyquist plot at frequency range from 100 kHz to 0.01 Hz and (d) capacitance performance at the range of current density from 0.3 to 20 A g<sup>-1</sup>.

**Table S1** Ionic conductivity of different composites calculated by the fitting result of EIS dates.

| Electrodes    | R <sub>s</sub><br>/Ω | R <sub>ct</sub><br>/Ω | σ <sub>e</sub> /<br>(S m <sup>-1</sup> ) | Z <sub>w</sub><br>/Ω | σ <sub>i</sub> /<br>(×10 <sup>-3</sup> S<br>m <sup>-1</sup> ) | R <sub>tol</sub><br>/Ω | σ/<br>(×10 <sup>-3</sup><br>S m <sup>-1</sup> ) |
|---------------|----------------------|-----------------------|------------------------------------------|----------------------|---------------------------------------------------------------|------------------------|-------------------------------------------------|
| ZnS/RGO/PANI  | 0.035                | 0.21                  | 4.08                                     | 564.3                | 1.77                                                          | 564.55                 | 1.77                                            |
| ZnS/RGO/PPy   | 0.219                | 0.18                  | 2.51                                     | 1236                 | 0.81                                                          | 1236.40                | 0.81                                            |
| ZnS/RGO/PTh   | 0.041                | 0.17                  | 4.74                                     | 684.2                | 1.46                                                          | 684.41                 | 1.46                                            |
| ZnS/RGO/PEDOT | 0.167                | 0.27                  | 2.28                                     | 1354                 | 0.74                                                          | 1354.44                | 0.74                                            |
| ZnS/RGO       | 0.053                | 0.40                  | 2.20                                     | 1630                 | 0.61                                                          | 1630.45                | 0.61                                            |

\* the thickness of electrode (L) is 100 μm and the surface area of electrode (S) is 1 cm<sup>2</sup>.

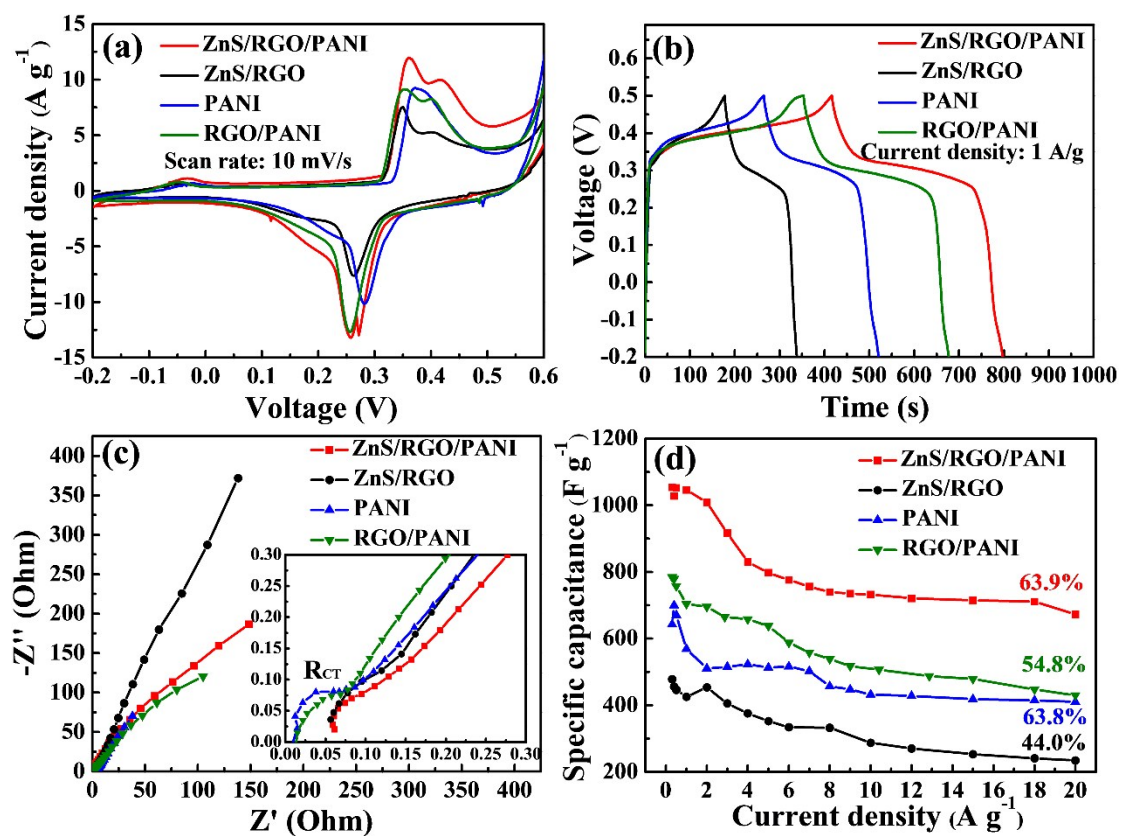

**Fig. S3** The electrochemical performance of ZnS/RGO/PANI, ZnS/RGO, PANI and RGO/PANI in three-electrode system: (a) CV curves at scan rate of  $10 \text{ mV s}^{-1}$ , (b) GCD plots at current density of  $1 \text{ A g}^{-1}$ , (c) Nyquist plot at frequency range from 100 kHz to 0.01 Hz and (d) capacitance performance at the range of current density from 0.3 to  $20 \text{ A g}^{-1}$ .

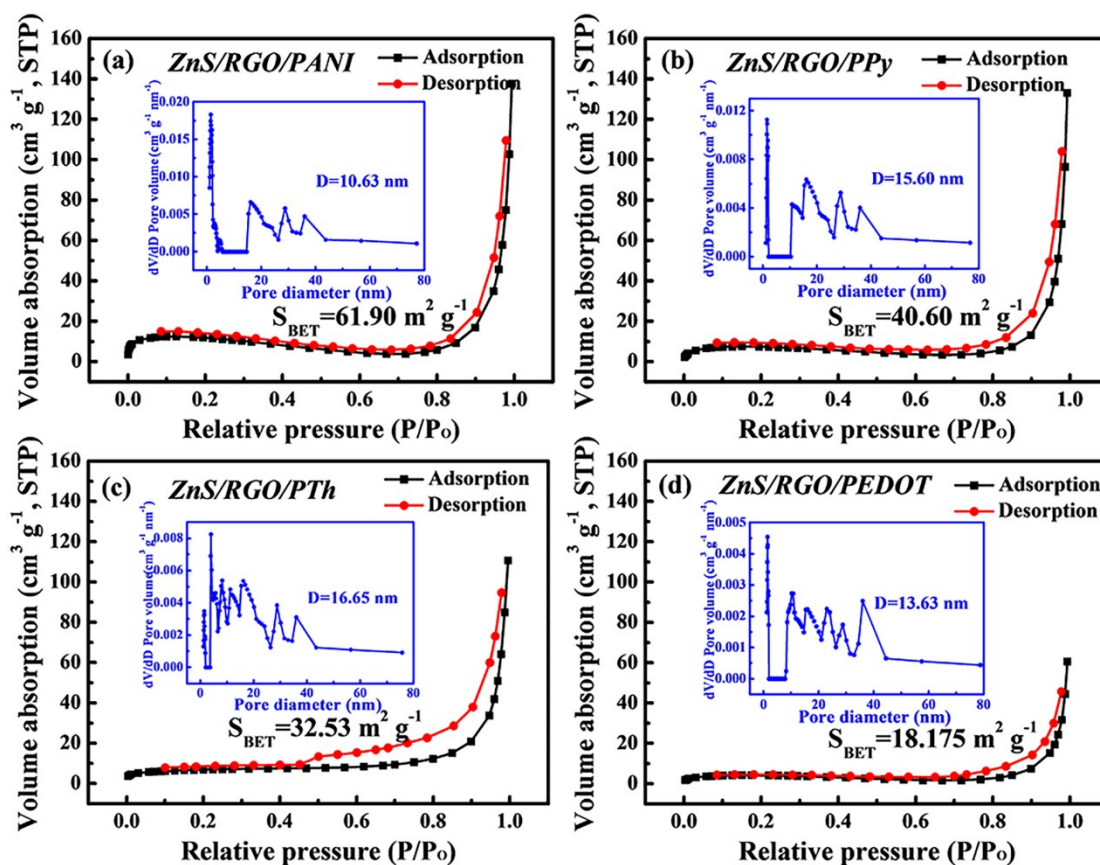

Fig. S4 Nitrogen adsorption-desorption isotherms and pore diameter distribution of (a) ZnS/RGO/PANI, (b) ZnS/RGO/PPy, (c) ZnS/RGO/PTh and (d) ZnS/RGO/PEDOT composites

Table S2 Atomic percentage of various polymer-coated ZnS/RGO composites according to the XPS spectrum.

| Samples       | C 1s<br>/% | N 1s<br>/% | O 1s<br>/% | S 2p<br>/% | Zn 2p<br>/% |
|---------------|------------|------------|------------|------------|-------------|
| ZnS/RGO/PANI  | 70.51      | 15.68      | 10.08      | 2.32       | 1.41        |
| ZnS/RGO/PPy   | 71.69      | 13.62      | 10.36      | 2.36       | 1.97        |
| ZnS/RGO/PTh   | 73.24      | -          | 13.38      | 10.61      | 2.77        |
| ZnS/RGO/PEDOT | 69.27      | -          | 21.87      | 6.56       | 2.30        |
